# Supplementary material for: Distinct Changes in Placental Ceramide Metabolism Characterize Type 1 and 2 Diabetic Pregnancies with Fetal Macrosomia or Preeclampsia
Source: MDPI journal article supplement (doi:10.3390/biomedicines11030932), 2023-03-17
Supplement: s1 [file s1]

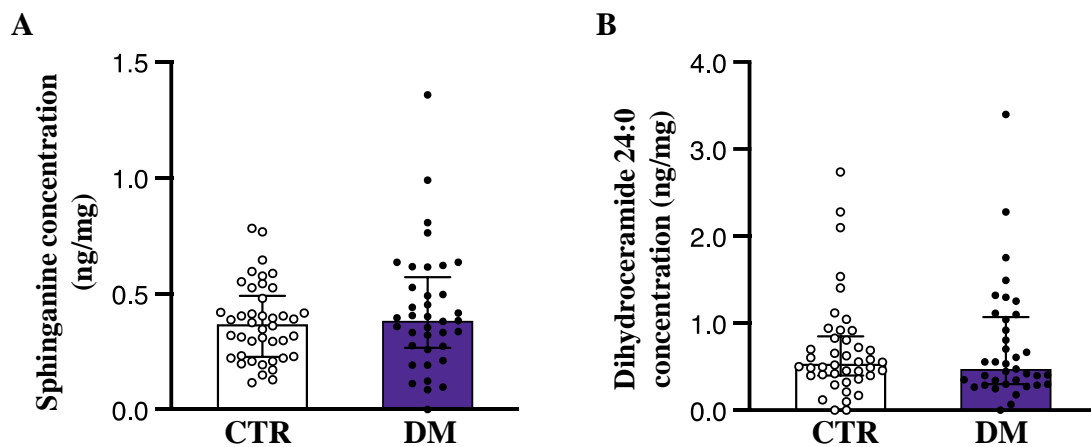

**Figure S1. Intermediates of the *de novo* pathway of ceramide synthesis.** (A) sphinganine and (B) dihydroceramide 24:0 concentrations in control vs. diabetic (type 1 and 2) placentae.
