# Supplementary material for: Distinct Changes in Placental Ceramide Metabolism Characterize Type 1 and 2 Diabetic Pregnancies with Fetal Macrosomia or Preeclampsia
Source: MDPI journal article supplement (doi:10.3390/biomedicines11030932), 2023-03-17
Supplement: s1 [file s1]

**Table S1. Placental concentrations of ceramide and bioactive lysosphingolipids in obese pregnancies compared to lean CTR pregnancies.**

| <b>Ceramides</b>              | <b>Non-obese CTR (n=27)</b> | <b>Obese CTR (n=7)</b> | <b>p value</b> |
|-------------------------------|-----------------------------|------------------------|----------------|
| <i>Total CER</i>              | 55.32 (42.66/67.03)         | 50.18 (34.83/63.84)    | 0.901          |
| CER 14:0                      | 0.12 (0.08/0.16)            | 0.11 (0.09/0.14)       | 0.677          |
| CER 16:0                      | 7.58 (5.62/9.24)            | 6.70 (5.38/8.47)       | 0.901          |
| CER 18:0                      | 1.07 (0.76/1.46)            | 1.52 (1.00/1.84)       | 0.201          |
| CER 20:0                      | 0.59 (0.51/0.91)            | 0.59 (0.47/1.19)       | 0.901          |
| CER 22:0                      | 9.24 (6.20/14.50)           | 7.54 (6.04/12.83)      | 1.000          |
| CER 24:0                      | 23.40 (16.67/28.30)         | 20.20 (14.26/23.90)    | 0.452          |
| CER 24:1                      | 12.60 (8.99/14.65)          | 11.62 (9.62/15.75)     | 0.771          |
| <b>Sphingoid-1-phosphates</b> | <b>Non-obese CTR (n=11)</b> | <b>Obese CTR (n=6)</b> | <b>p value</b> |
| <i>SIP+SaIP</i>               | 0.086 (0.055/0.089)         | 0.097 (0.067/0.149)    | 0.301          |

Lipid concentrations (ng/mg of tissue). Values are median (interquartile range). Obese group: BMI 32.1-64.1 kg/m<sup>2</sup>; lean group: BMI 17.2-27.7 kg/m<sup>2</sup>. Ceramides (CER); Total sphingoid-1-phosphates (Total sphingoid-1-P); Sphingosine-1-phosphate (S1P); sphinganine-1-phosphate (Sa1P).
