# Supplementary material for: Distinct Changes in Placental Ceramide Metabolism Characterize Type 1 and 2 Diabetic Pregnancies with Fetal Macrosomia or Preeclampsia
Source: MDPI journal article supplement (doi:10.3390/biomedicines11030932), 2023-03-17
Supplement: s1 [file s1]

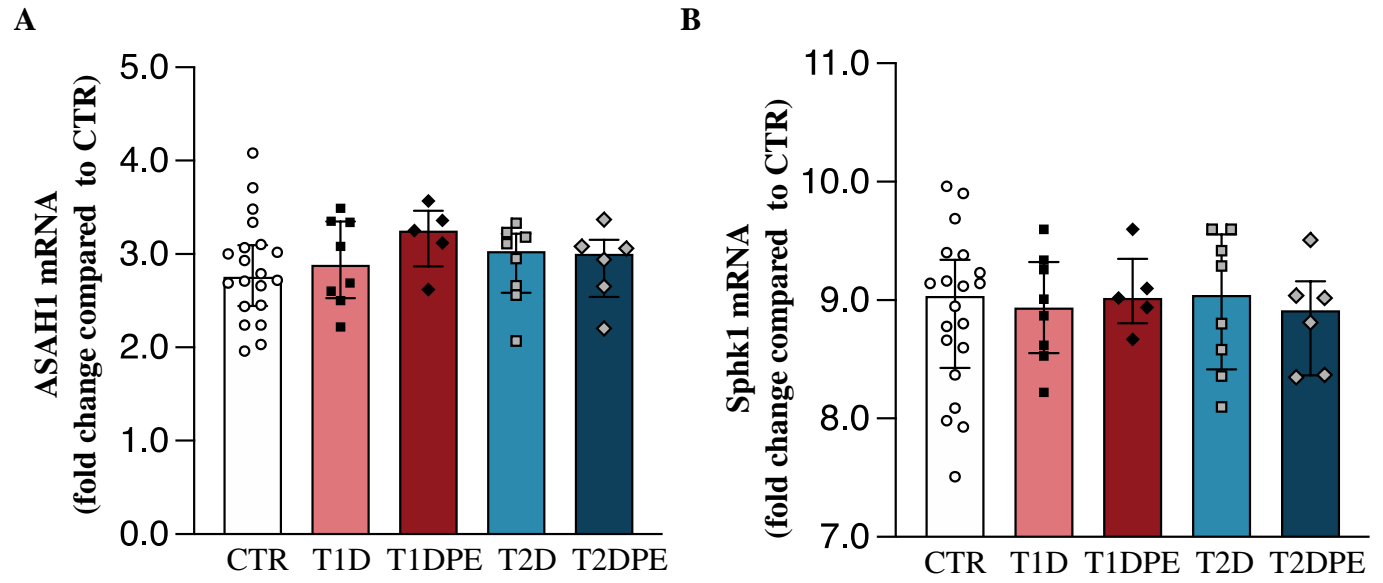

**Figure S2. ASAHI and SPHK mRNA expression in type 1 and type 2 diabetic placentae.** qPCR analysis of (A) placental acid ceramidase (ASAH1) and (B) sphingosine kinase 1 (SPHK1) mRNA levels.
